# Supplementary material for: Development and validation of a time and motion guide to assess the costs of prevention and control interventions for nosocomial infections: A Delphi method among experts
Source: PLoS One. 2020 Nov 12;15(11):e0242212. doi: 10.1371/journal.pone.0242212 (PMC7660509; doi:10.1371/journal.pone.0242212)
Supplement: S3 File — (XLSX) [file pone.0242212.s003.xlsx]

## Sheet: Content Validity Index round 1
	Professional in a clinical facility not associated with a University (Group 1)						Professional in a clinical facility associated with a University (Group 2)						Professional expert not working in a clinical facility (Group 3)
Items and Dimensions	Group 1:1 (expert #1)	Group 1:2 (expert #2)	Group 1:3 (expert #3)	Group 1:4 (expert #4)	Group 1:5 (expert #5)	Group 1:6 (expert #6)	Group 2: 1 (expert #7)	Group 2: 2 (expert #8)	Group 2: 3 (expert #9)	Group 2: 4 (expert #10)	Group 2: 5 (expert #11)	Group 2: 6 (expert #12)	Group 3:1 (expert #13)	Group 3:2 (expert #14)	Group 3:3 (expert #15)	Group 3:4 (expert #16)	Group 3:5 (expert #17)	Group 3:6 (expert #18)	Group 1	Group 2	Group 3	Number of 1	Number of 2	Number of 3	Number of 4	CVI-4
Identification of Facility												12	13													0.754167
Identification of Health Care Facility	4	4	4	4	4	4	4	4	4		4	4	4	3	4		4	4	4	4	3.8	0	0	1	15	0.9375
Number of beds in the facility	4	4	4	3	4	4	4	4	2		4	4	4	3	4		4	4	3.83333	3.6	3.8	0	1	2	13	0.8125
Type of Unit	3	4	4	4	4	3	4	4	3		4	4	3		4		3	4	3.66667	3.8	3.5	0	0	5	10	0.666667
Number of beds in the unit	4	4	4	3	4	3	4	4	3		4	4	4	3	2		2	4	3.66667	3.8	3	0	2	4	10	0.625
Format of hydroalcoholic solution in unit	3	4	3	4	4	4	4	4	3		4	4	3	3	4		4	4	3.66667	3.8	3.6	0	0	5	11	0.6875
Brand of hydroalcoholic solution in unit	3	4	4	4	4		1	4	4		4	4	4	3	4		4	4	3.8	3.4	3.8	1	0	2	12	0.8
Brand of soap used in unit	3	4	4	4	4	4	1	4	3		4	4	4	3	4		4	4	3.83333	3.2	3.8	1	0	3	12	0.75
Personal Identification																										0.765625
Health care professional observed	4	4	4	4	4	4	4	4	4		4	4	4	4	4		3	3	4	4	3.6	0	0	2	14	0.875
Level of education	4	4	1	4	4	4	1	4	3		4	2	3	4	4		1	2	3.5	2.8	2.8	3	2	2	9	0.5625
Number of years of experience in hospital unit	4	4	4	3	4	4	1	4	4		4	4	4	4	4		1	4	3.83333	3.4	3.4	2	0	1	13	0.8125
Number of years of experience in position held	4	4	4	3	4	4	4	4	4		4	4	4	4	4		2	3	3.83333	4	3.4	0	1	2	13	0.8125
Zone																										0.666667
Area where action is being observed	4	3	4	4	4	4	4	4	3		4	4	4	4	4		3	4	3.83333	3.8	3.8	0	0	3	13	0.8125
Outside of room	3	3	4	3	4	3	1	4	3		4	4	3	4	4		3	4	3.33333	3.2	3.6	1	0	7	8	0.5
Room	4	3	4	3	4	4	4	4	3		4	4	4	3	4		2	4	3.66667	3.8	3.4	0	1	4	11	0.6875
Additional Precautions																										0.666667
Type of additional precautions	3	4	3	4	4	4	4	4	3		4	4	3	4	4		4	4	3.66667	3.8	3.8	0	0	4	12	0.75
Hand Hygiene																										0.625
Moment	3	4	4	3	4	4	1	3	3		4	4	4	3	4		3	4	3.66667	3	3.6	1	0	6	9	0.5625
Products used	4	4	3	3	4	4	3	4	3		4	4	3	4	4		4	4	3.66667	3.6	3.8	0	0	5	11	0.6875
Personal protective equipment																										0.78125
Action of donning or removing equipment	4	3	3	4	3	4	4	4	4		4	4	4	4	4		4	4	3.5	4	4	0	0	3	13	0.8125
Equipment used	4	3	3	3	4	4	3	4	4		4	4	4	4	4		4	4	3.5	3.8	4	0	0	4	12	0.75
Screening																										0.562937
C.difficile		3	3	4	3		3	4	4		4	4		3	4		4	4	3.25	3.8	3.75	0	0	5	8	0.615385
Number of samples (swabs) used for MRSA		3	4	4			3	4	3		4			3	4		2	4	3.66667	3.5	3.25	0	1	4	6	0.545455
Number of samples (swabs) used for VRE		3	4	4			3	4	3		4			3	4		2	4	3.66667	3.5	3.25	0	1	4	6	0.545455
Number of samples (swabs) used for CPGNB		3	4	4			3	4	3		4			3	4		2	4	3.66667	3.5	3.25	0	1	4	6	0.545455
Cleaning and disinfecting of small equipment																										0.83378
Type of health care equipment	4	3	3	4	3	4	4	4	3		4	4	4	3	4		4	4	3.5	3.8	3.8	0	0	5	11	0.6875
Product used	4	3	4	4		4	4	4	4		4	4	4	4	4		4	4	3.8	4	4	0	0	1	14	0.933333
Quantity of each product used	4	4	4	4		4	4	4	4		4	4	4		4		4	4	4	4	4	0	0	0	14	1
Products	4	3	3	4		4	4	4	3		4	4	3		4		4	4	3.6	3.8	3.75	0	0	4	10	0.714286
Hygiene and Sanitation																										0.7
Kind of cleaning	3	4	3	3	4	4	3	3	4		4	4	3	4	4		4	4	3.5	3.6	3.8	0	0	6	10	0.625
Zone cleaned	3	4	3	4	4	3	4	4	3		4	3	4	4	4		4	4	3.5	3.6	4	0	0	5	11	0.6875
Materials used	3	3	3	3	4	4	4	4	4		4	4	4	4	4		4	4	3.33333	4	4	0	0	4	12	0.75
Products	4	3	4	4	4	3	4	4	3		4	4	4	4	4		4	4	3.66667	3.8	4	0	0	3	13	0.8125
Quantity of product	2	3	3	4	4	3	4	2	3		4	4	4	4	4		4	4	3.16667	3.4	4	0	2	4	10	0.625

## Sheet: Reliability round 1
				Kruskal Wallis test
ITEMS AND DIMENSIONS	Group 1	Group 2	Group 3	Value	P-value	CVI-4	Number of items
Identification of Health Care Facility	4	4	3.8			0.9375	3.8
Number of beds in the facility	3.83333	3.6	3.8			0.8125	3.8
Type of Unit	3.66667	3.8	3.5			0.666667	3.5
Number of beds in the unit	3.66667	3.8	3			0.625	3
Format of hydroalcoholic solution in unit	3.66667	3.8	3.6			0.6875	3.6
Brand of hydroalcoholic solution in unit	3.8	3.4	3.8			0.8	3.8
Brand of soap used in unit	3.83333	3.2	3.8			0.75	3.8
UNIT IDENTIFICATION	3.78095	3.65714	3.61429	2.013	0.365	0.754167	7
Health care professional observed	4	4	3.6			0.875	3.6
Level of education	3.5	2.8	2.8			0.5625	2.8
Number of years of experience in hospital unit	3.83333	3.4	3.4			0.8125	3.4
Number of years of experience in position held	3.83333	4	3.4			0.8125	3.4
PERSONAL IDENTIFICATION	3.79167	3.55	3.3	3.119	0.21	0.765625	4
Area where action is being observed	3.83333	3.8	3.8			0.8125	3.8
Outside of room	3.33333	3.2	3.6			0.5	3.6
Room	3.66667	3.8	3.4			0.6875	3.4
ZONE	3.61111	3.6	3.6	0.092	0.955	0.666667	3
Type of additional precautions	3.66667	3.8	3.8			0.75	3.8
TYPE DE PRECAUTIONS	3.66667	3.8	3.8	0.02	0.368	0.666667	1
Moment	3.66667	3	3.6			0.5625	3.6
Products used	3.66667	3.6	3.8			0.6875	3.8
HAND HYGIENE	3.66667	3.3	3.7	2.803	0.246	0.625	2
Action of donning or removing equipment	3.5	4	4			0.8125	4
Equipment used	3.5	3.8	4			0.75	4
EQUIPEMENT DE PROTECTION	3.5	3.9	4	4.333	0.115	0.78125	2
C.difficile	3.25	3.8	3.75			0.615385	3.75
Number of samples (swabs) used for MRSA	3.66667	3.5	3.25			0.545455	3.25
Number of samples (swabs) used for VRE	3.66667	3.5	3.25			0.545455	3.25
Number of samples (swabs) used for CPGNB	3.66667	3.5	3.25			0.545455	3.25
SCREENING	3.5625	3.575	3.375	1.734	0.42	0.562937	4
Type of health care equipment	3.5	3.8	3.8			0.6875	3.8
Product used	3.8	4	4			0.933333	4
Quantity of each product used	4	4	4			1	4
Products	3.6	3.8	3.75			0.714286	3.75
CLEANING OF SMALL EQUIPMENT	3.725	3.9	3.8875	1.88	0.391	0.83378	4
Kind of cleaning	3.5	3.6	3.8			0.625	3.8
Zone cleaned	3.5	3.6	4			0.6875	4
Materials used	3.33333	4	4			0.75	4
Products	3.66667	3.8	4			0.8125	4
Quantity of product	3.16667	3.4	4			0.625	4
HYGIENE AND SANITATION	3.43333	3.68	3.96	9.015	0.011	0.7	5
OVERALL	3.63754	3.66246	3.69298			0.706232	32

## Sheet: Content Validity round 2
	Group 1					Group 2					Group 3
Dimension	1	2	3	4	5	6	7	8	9	10	11	12	13	14	Group 1	Group 2	Group 3	Frequencies	Number of 4	CVI-4
Identification of Facility															3.93333	3.91667	3.95833			0.934524
Identification of Health Care Facility	4	4	4	4	4	4	4	4	4	4	4	4	4	4	4	4	4	1=0, 2=0, 3=0, 4=14	14	1
Number of beds in the facility (as per permit)	4	4	4	4	4	4	4	4	4	4	4	4	4	4	4	4	4	1=0, 2=0, 3=0, 4=14	14	1
Unit name	4	4	4	4	4	4	4	4	4	4	4	4	4	4	4	4	4	1=0, 2=0, 3=0, 4=14	14	1
Type of Unit	4	4	4	4	4	4	4	4	4	4	4	4	4	4	4	4	4	1=0, 2=0, 3=0, 4=14	14	1
Number of beds in the unit (as per permit)	4	4	4	4	4	4	4	4	4	4	4	4	4	4	4	4	4	1=0, 2=0, 3=0, 4=14	14	1
Number of hydroalcoholic solution (HSA) dispensers in corridor and at door to room, in unit	4	4	3	4	4	4	4	4	3	4	4	4	4	4	3.8	3.8	4	1=0, 2=0, 3=2, 4=12	12	0.857143
Format of hydroalcoholic solution in unit	4	4	4	4	4	4	4	4	4	4	4	4	4	4	4	4	4	1=0, 2=0, 3=0, 4=14	14	1
Brand of hydroalcoholic solution used in unit	4	4	4	4	4	4	4	4	4	4	4	4	4	4	4	4	4	1=0, 2=0, 3=0, 4=14	14	1
Brand of soap used in unit	4	4	4	4	4	4	4	4	4	4	4	4	4	4	4	4	4	1=0, 2=0, 3=0, 4=14	14	1
Brand of the 1st hygiene and sanitation product with diluent	4	3	3	4	4	4	3	4	4	3	4	3	4	4	3.6	3.6	3.75	1=0, 2=0, 3=5, 4=9	9	0.642857
Brand of the 1st hygiene and sanitation product ready to use	3	4	4	4	4	4	3	4	4	4	4	4	3	4	3.8	3.8	3.75	1=0, 2=0, 3=3, 4=11	11	0.785714
Use of hygienic covers (yes-no)	4	4	4	4	4	4	3	4	4	4	4	4	4	4	4	3.8	4	1=0, 2=0, 3=1, 4=13	13	0.928571
Personal Identification															3.92	3.96	4			0.971429
Identification of Health Care Facility	4	4	4	4	4	4	4	4	4	4	4	4	4	4	4	4	4	1=0, 2=0, 3=0, 4=14	14	1
Unit name	4	4	4	4	4	4	4	4	4	4	4	4	4	4	4	4	4	1=0, 2=0, 3=0, 4=14	14	1
Code of the professional being observed	4	4	2	4	4	4	4	4	3	4	4	4	4	4	3.6	3.8	4	1=0, 2=1, 3=1, 4=12	12	0.857143
Health care professional observed	4	4	4	4	4	4	4	4	4	4	4	4	4	4	4	4	4	1=0, 2=0, 3=0, 4=14	14	1
Number of years of experience in current position	4	4	4	4	4	4	4	4	4	4	4	4	4	4	4	4	4	1=0, 2=0, 3=0, 4=14	14	1
Zone															3.81111	3.9	3.94444			0.880952
Area where action is being observed	4	4	4	3	4	4	4	4	4	4	3	4	4	4	3.8	4	3.75	1=0, 2=0, 3=2, 4=12	12	0.857143
Outside of room (without corridor)	4	3	4	4	4	4	4	4	4	3	4	4	4	4	3.8	3.8	4	1=0, 2=0, 3=2, 4=12	12	0.857143
Corridor	4	3	4	4	4	4	4	3	4	4	3	4	3	4	3.8	3.8	3.5	1=0, 2=0, 3=4, 4=10	10	0.714286
Room	4	4	4	4	3	4	4	4	4	4	4	4	4	4	3.8	4	4	1=0, 2=0, 3=1, 4=13	13	0.928571
Private room with 1 bed	4	4	4	4	4	4	4	4	4	4	3	4	4	4	4	4	3.75	1=0, 2=0, 3=1, 4=13	13	0.928571
Semi-private with 2 beds	4	4	4	4	3	4	4	4	4	4	4	4	4	4	3.8	4	4	1=0, 2=0, 3=1, 4=13	13	0.928571
Room with 3 beds	4	4	4	4	3	4	4	4	4	4	4	4	4	4	3.8	4	4	1=0, 2=0, 3=1, 4=13	13	0.928571
Room with 4 beds	4	4	4	3	4	4	4	4	4	4	4	4	4	4	3.8	4	4	1=0, 2=0, 3=1, 4=13	13	0.928571
Room with 5 beds	4	4	4	4	3	4	4	4	4	4	4	4	4	4	3.8	4	4	1=0, 2=0, 3=1, 4=13	13	0.928571
Room with 6 beds	4	4	4	4	3	4	4	4	4	4	4	4	4	4	3.8	4	4	1=0, 2=0, 3=1, 4=13	13	0.928571
Other area (describe)	4	4	4	4	3	4	4	4	4	4	4	4	4	4	3.8	4	4	1=0, 2=0, 3=1, 4=13	13	0.928571
Number of HAS (hydroalcoholic solution dispensers) in private room	3	4	4	4	4	4	4	4	4	3	4	4	4	4	3.8	3.8	4	1=0, 2=0, 3=2, 4=12	12	0.857143
Number of HAS dispensers in semi-private room (2 beds)	3	4	4	4	4	4	4	4	4	3	4	4	4	4	3.8	3.8	4	1=0, 2=0, 3=2, 4=12	12	0.857143
Number of HAS dispensers in room with 3 beds	3	4	4	4	4	4	4	4	4	3	4	4	4	4	3.8	3.8	4	1=0, 2=0, 3=2, 4=12	12	0.857143
Number of HAS dispensers in room with 4 beds	3	4	4	4	4	4	4	4	4	3	4	4	4	4	3.8	3.8	4	1=0, 2=0, 3=2, 4=12	12	0.857143
Number of HAS dispensers in room with 5 beds	3	4	4	4	4	4	4	4	4	3	4	4	4	4	3.8	3.8	4	1=0, 2=0, 3=2, 4=12	12	0.857143
Number of HAS dispensers in room with 6 beds	3	4	4	4	4	4	4	4	4	3	4	4	4	4	3.8	3.8	4	1=0, 2=0, 3=2, 4=12	12	0.857143
Number of HAS dispensers in room, other area	3	4	4	4	4	4	4	4	4	3	4	4	4	4	3.8	3.8	4	1=0, 2=0, 3=2, 4=12	12	0.857143
Additional Precautions															3.8	3.8	4			0.857143
Type of precautions	4	4	4	4	3	4	4	4	4	3	4	4	4	4	3.8	3.8	4	1=0, 2=0, 3=2, 4=12	12	0.857143
Hand Hygiene															4	4	4			1
Moment	4	4	4	4	4	4	4	4	4	4	4	4	4	4	4	4	4	1=0, 2=0, 3=0, 4=14	14	1
Products used	4	4	4	4	4	4	4	4	4	4	4	4	4	4	4	4	4	1=0, 2=0, 3=0, 4=14	14	1
Personal protective equipment															3.8	4	3.875			0.892857
Action of donning or removing equipment	4	4	4	4	3	4	4	4	4	4	3	4	4	4	3.8	4	3.75	1=0, 2=0, 3=2, 4=12	12	0.857143
Equipment used	4	4	4	3	4	4	4	4	4	4	4	4	4	4	3.8	4	4	1=0, 2=0, 3=1, 4=13	13	0.928571
Screening															3.65714	3.85714	4			0.908163
C.difficile	4	4	4	4	4	4	4	4	4	4	4	4	4	4	4	4	4	1=0, 2=0, 3=0, 4=14	14	1
MRSA-→note Group of sample	4	1	4	4	4	4	4	4	3	4	4	4	4	4	3.4	3.8	4	1=0, 2=0, 3=1, 4=12	12	0.857143
Number of samples (swabs) used for MRSA	4	4	2	4	4	4	4	4	4	4	4	4	4	4	3.6	4	4	1=0, 2=0, 3=0, 4=13	13	0.928571
VRE →note Group of sample	4	2	4	4	4	4	4	3	4	4	4	4	4	4	3.6	3.8	4	1=0, 2=0, 3=1, 4=12	12	0.857143
Number of samples (swabs) used for VRE	4	4	2	4	4	4	4	4	4	4	4	4	4	4	3.6	4	4	1=0, 2=0, 3=0, 4=13	13	0.928571
CPGNB→ note Group of sample	4	4	4	3	4	4	1	4	4	4	4	4	4	4	3.8	3.4	4	1=0, 2=0, 3=1, 4=12	12	0.857143
Number of samples (swabs) used for CPGNB	4	4	4	2	4	4	4	4	4	4	4	4	4	4	3.6	4	4	1=0, 2=0, 3=0, 4=13	13	0.928571
Cleaning and disinfecting of small equipment															4	3.85	4			0.946429
Type of health care equipment	4	4	4	4	4	4	4	4	4	3	4	4	4	4	4	3.8	4	1=0, 2=0, 3=1, 4=13	13	0.928571
Product used	4	4	4	4	4	4	4	4	4	3	4	4	4	4	4	3.8	4	1=0, 2=0, 3=1, 4=13	13	0.928571
Quantity of each product used	4	4	4	4	4	4	4	4	4	4	4	4	4	4	4	4	4	1=0, 2=0, 3=0, 4=14	14	1
Products	4	4	4	4	4	4	4	4	4	3	4	4	4	4	4	3.8	4	1=0, 2=0, 3=1, 4=13	13	0.928571
Hygiene and Sanitation															3.85	3.6	4			0.803571
Kind of cleaning	4	4	3	4	4	3	4	3	4	4	4	4	4	4	3.8	3.6	4	1=0, 2=0, 3=3, 4=11	11	0.785714
If terminal, additional precautions	4	4	3	4	4	3	4	3	4	4	4	4	4	4	3.8	3.6	4	1=0, 2=0, 3=3, 4=11	11	0.785714
Materials used	4	4	3	4	4	3	4	3	4	4	4	4	4	4	3.8	3.6	4	1=0, 2=0, 3=3, 4=11	11	0.785714
Products	4	4	4	4	4	3	4	3	4	4	4	4	4	4	4	3.6	4	1=0, 2=0, 3=2, 4=12	12	0.857143

## Sheet: Reliability round 2
				Kruskal Wallis test
Dimension	Group 1	Group 2	Group 3	Value	P-value	CVI -4	Number of items
Identification of Facility	3.93333	3.91667	3.95833	0.208	0.901	0.934524	12
Identification of Health Care Facility	4	4	4			1
Number of beds in the facility (as per permit)	4	4	4			1
Unit name	4	4	4			1
Type of Unit	4	4	4			1
Number of beds in the unit (as per permit)	4	4	4			1
Number of hydroalcoholic solution (HSA) dispensers in corridor and at door to room, in unit	3.8	3.8	4			0.857143
Format of hydroalcoholic solution in unit	4	4	4			1
Brand of hydroalcoholic solution used in unit	4	4	4			1
Brand of soap used in unit	4	4	4			1
Brand of the 1st hygiene and sanitation product with diluent	3.6	3.6	3.75			0.642857
Brand of the 1st hygiene and sanitation product ready to use	3.8	3.8	3.75			0.785714
Use of hygienic covers (yes-no)	4	3.8	4			0.928571
Personal Identification	3.92	3.96	4	1.086	0.581	0.971429	5
Identification of Health Care Facility	4	4	4			1
Unit name	4	4	4			1
Code of the professional being observed	3.6	3.8	4			0.857143
Health care professional observed	4	4	4			1
Number of years of experience in current position	4	4	4			1
Zone	3.81111	3.9	3.94444	10.202	0.006	0.880952	18
Area where action is being observed	3.8	4	3.75			0.857143
Outside of room (without corridor)	3.8	3.8	4			0.857143
Corridor	3.8	3.8	3.5			0.714286
Room	3.8	4	4			0.928571
Private room with 1 bed	4	4	3.75			0.928571
Semi-private with 2 beds	3.8	4	4			0.928571
Room with 3 beds	3.8	4	4			0.928571
Room with 4 beds	3.8	4	4			0.928571
Room with 5 beds	3.8	4	4			0.928571
Room with 6 beds	3.8	4	4			0.928571
Other area (describe)	3.8	4	4			0.928571
Number of HAS (hydroalcoholic solution dispensers) in private room	3.8	3.8	4			0.857143
Number of HAS dispensers in semi-private room (2 beds)	3.8	3.8	4			0.857143
Number of HAS dispensers in room with 3 beds	3.8	3.8	4			0.857143
Number of HAS dispensers in room with 4 beds	3.8	3.8	4			0.857143
Number of HAS dispensers in room with 5 beds	3.8	3.8	4			0.857143
Number of HAS dispensers in room with 6 beds	3.8	3.8	4			0.857143
Number of HAS dispensers in room, other area	3.8	3.8	4			0.857143
Additional Precautions	3.8	3.8	4	2	0.368	0.857143	1
Type of precautions	3.8	3.8	4			0.857143
Hand Hygiene	4	4	4	0	1	1	2
Moment	4	4	4			1
Products used	4	4	4			1
Personal protective equipment	3.8	4	3.875	2.333	0.311	0.892857	2
Action of donning or removing equipment	3.8	4	3.75			0.857143
Equipment used	3.8	4	4			0.928571
Screening	3.65714	3.85714	4	9.937	0.007	0.908163	7
C.difficile	4	4	4			1
MRSA-→note site of sample	3.4	3.8	4			0.857143
Number of samples (swabs) used for MRSA	3.6	4	4			0.928571
VRE →note site of sample	3.6	3.8	4			0.857143
Number of samples (swabs) used for VRE	3.6	4	4			0.928571
CPGNB→ note site of sample	3.8	3.4	4			0.857143
Number of samples (swabs) used for CPGNB	3.6	4	4			0.928571
Cleaning and disinfecting of small equipment	4	3.85	4	7.333	0.026	0.946429	4
Type of health care equipment	4	3.8	4			0.928571
Product used	4	3.8	4			0.928571
Quantity of each product used	4	4	4			1
Products	4	3.8	4			0.928571
Hygiene and Sanitation	3.85	3.6	4	9.952	0.007	0.803571	4
Kind of cleaning	3.8	3.6	4			0.785714
If terminal, additional precautions	3.8	3.6	4			0.785714
Materials used	3.8	3.6	4			0.785714
Products	4	3.6	4			0.857143
OVERALL	3.86351	3.87598	3.97531			0.910563	55
